# Supplementary material
Source: publisher figshare collection journal article supplement (https://acs.figshare.com/ndownloader/files/4630780)
Supplement: Supplementary file 1 [file 4630780]

## Supporting Information:

### A general model for the kinetics of self-condensing vinyl polymerization

Zhiping Zhou<sup>\*1</sup>, Deyue Yan<sup>2</sup>

1. School of Materials Science and Engineering, Jiangsu University,  
301 Xuefu Road, Zhenjiang 212013, China

2. The State Key Laboratory of Metal Matrix Composites, Shanghai Jiao Tong  
University, 800 Dongchuan Road, Shanghai 200240, China

#### 1. Distribution function

Looking at the eq 11 carefully, we can find that it has following tentative solution:

$$P_{n,m} = M_0 Q_{n,m} (1-x) x^{n+m-1} e^{-nx/\alpha} \quad (A1)$$

Where  $Q_{n,m}$  is the constant needing to be determined. Substituting eq A1 into Eq.(11) leads:

$$Q_{n,m} = \frac{n}{2\alpha(n+m-1)} \sum_{i,j} Q_{i,j} Q_{n-i,m-j} \quad (A2)$$

It can be known from eq 11 and the initial conditions that:

$$Q_{1,0} = \alpha, \quad Q_{0,1} = 1 - \alpha \quad (A3)$$

Combining eq A2 with eq A3 and taking a direct summation gives rise to

$$Q_{n,m} = \alpha \frac{n^{n+m-1}}{n!m!} \left( \frac{1-\alpha}{\alpha} \right)^m \quad (A4)$$

In summary, the solution of eq 11 is

$$P_{n,m} = \alpha M_0 \frac{n^{n+m-1}}{n!m!} \left( \frac{1-\alpha}{\alpha} \right)^m (1-x) x^{n+m-1} e^{-nx/\alpha} \quad (A5)$$

#### 2. The second moment

Eq 13 can be rewritten by

$$P_i = \sum_{n=0}^i P_{n,i-n} = \alpha M_0 \frac{1-x}{x} \sigma^i \sum_{n=0}^i \frac{n^{i-1}}{n!(i-n)!} \eta^n \quad (A6)$$

Where

---

\* Corresponding author. Telephone: +86-511-88791919; Fax: +86-511-88791947; Email: zhouzp@ujs.edu.cn

$$\sigma = \frac{1-\alpha}{\alpha}x \quad \eta = \frac{\alpha}{1-\alpha}e^{-x/\alpha} \quad (\text{A7})$$

Combining eq A6 with eqs 3 and 4 yields:

$$\sum_i \sigma^i \sum_{n=0}^i \frac{n^{i-1}}{n!(i-n)!} \eta^n = \frac{x}{\alpha} \quad (\text{A8})$$

Therefore

$$\begin{aligned} \sum_i i^2 P_i &= \alpha M_0 \frac{1-x}{x} \left( \sigma \frac{\partial}{\partial \sigma} \right)^2 \left[ \sum_i \sigma^i \sum_{n=0}^i \frac{n^{i-1}}{n!(i-n)!} \eta^n \right] \\ &= \alpha M_0 \frac{1-x}{x} \left( \sigma \frac{\partial}{\partial \sigma} \right)^2 \left( \frac{x}{\alpha} \right) = M_0 \frac{\alpha + x^2 - \alpha x^2}{\alpha(1-x)^2} \end{aligned} \quad (\text{A9})$$
